# Supplementary material for: Intraspecific variability of cadmium tolerance and accumulation, and cadmium-induced cell wall modifications in the metal hyperaccumulator Arabidopsis halleri
Source: PubMed Central journal article supplement (PMC4449548; doi:10.1093/jxb/erv144), 2015-04-06
Supplement: supp_erv144_jexbot143420_file001.pdf [file supp_erv144_jexbot143420_file001.pdf]

**Intra-specific variability of cadmium tolerance, accumulation and Cd-induced cell wall modifications in the metal hyperaccumulator *Arabidopsis halleri***

Claire-Lise Meyer, Michal Juraniec, Stéphanie Huguet, Elena Chavez-Rodrigues, Piétro Salis, Marie-Pierre Isaure, Erik Goormaghtigh, and Nathalie Verbruggen

Table S1 : Correlations between the mineral concentrations, the concentration of chlorophyll and the shoot dry biomass in the studied *A. halleri* individuals. Upper part, in NC condition (0  $\mu$ M CdSO<sub>4</sub>),  $n = 52$  ; lower part, in C condition (5  $\mu$ M CdSO<sub>4</sub>),  $n = 65$ .

|     | Cd                  | Zn               | Fe               | Mg               | Ca               | K               | RCC             | DSB              |
|-----|---------------------|------------------|------------------|------------------|------------------|-----------------|-----------------|------------------|
| Zn  | 0.023               |                  | 0.142            | <b>0.455 **</b>  | <b>0.420 **</b>  | -0.111          | 0.066           | -0.202           |
| Fe  | <b>-0.443 ***</b>   | -0.118           |                  | 0.262            | 0.232            | <b>0.366 *</b>  | 0.115           | -0.051           |
| Mg  | <b>0.389 **</b>     | <b>0.285 *</b>   | <b>-0.342 *</b>  |                  | <b>0.595 ***</b> | -0.180          | -0.019          | <b>-0.475 **</b> |
| Ca  | <b>0.413 **</b>     | <b>0.433 ***</b> | -0.293           | <b>0.601 ***</b> |                  | <b>-0.352 *</b> | 0.190           | <b>-0.389 *</b>  |
| K   | 0.209               | -0.037           | <b>0.312 *</b>   | -0.260           | -0.170           |                 | <b>-0.365 *</b> | 0.039            |
| RCC | <b>-0.718 *****</b> | 0.102            | <b>0.408 ***</b> | <b>-0.295 *</b>  | 0.141            | <b>-0.356 *</b> |                 | 0.258            |
| DSB | -0.270              | -0.204           | 0.129            | <b>-0.273 *</b>  | 0.118            | -0.118          | 0.250           |                  |

RCC, relative chlorophyll content; DSB, dry shoot biomass; \*\*\*\*\*,  $P < 0.0001$ ; \*\*\*,  $P < 0.001$ ; \*\*,  $P < 0.01$ ; \*,  $P < 0.05$ .

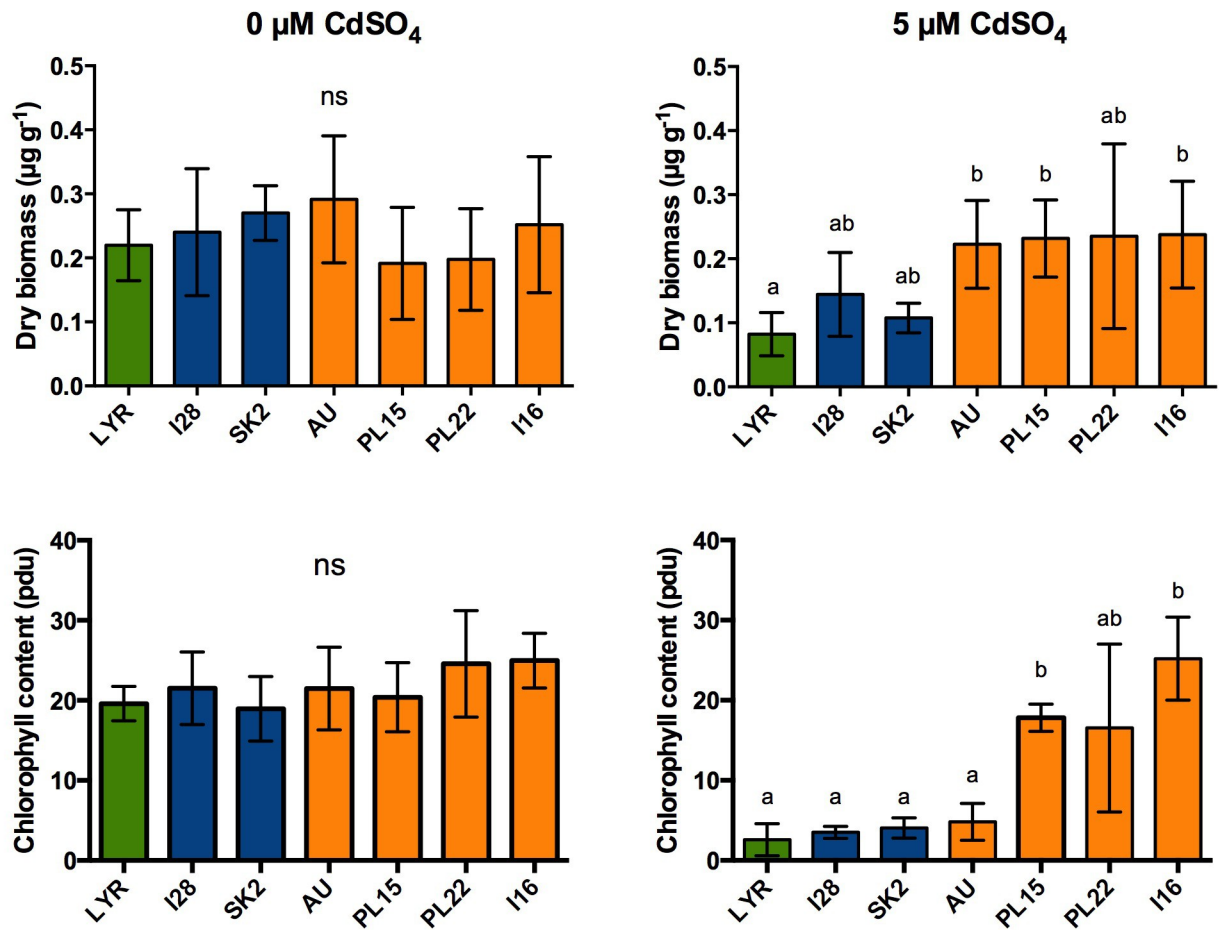

**Figure S1:** Dry shoot biomass and relative chlorophyll content in hydroponically growth *A. halleri* NM (blue bars) and M (orange bars) populations and *A. lyrata petraea* (green bars). Plants were cultivated for 3 weeks in control solution (0 µM CdSO<sub>4</sub>) or Cd contaminated solution (5 µM CdSO<sub>4</sub>). Data are mean ± SD, *n* = 3 to 16. Letters indicate significant differences at the 5 % level; ns, non significant.

*A. lyrata petreae*

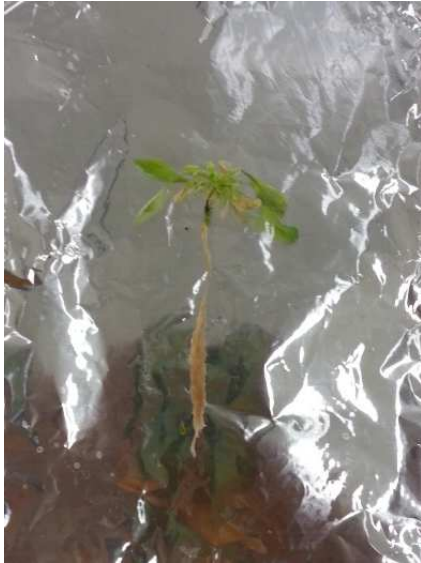

*A. halleri* I28

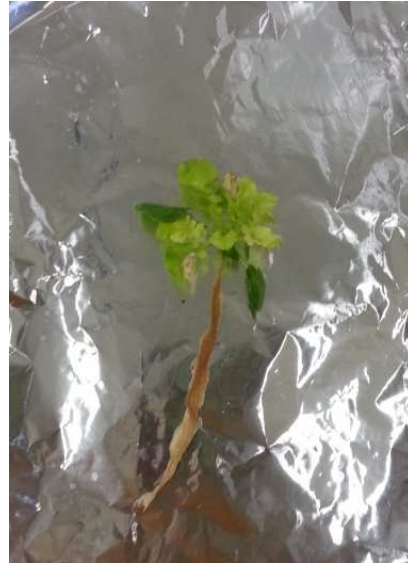

*A. halleri* AU

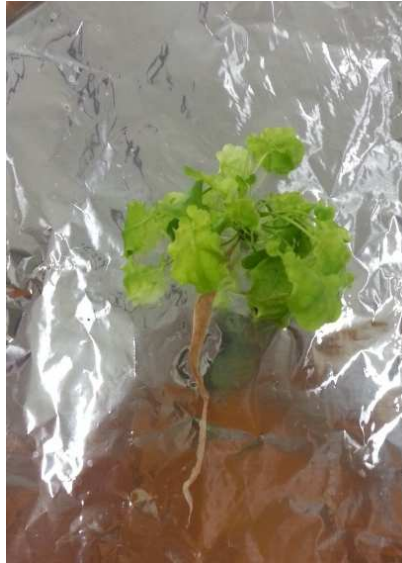

*A. halleri* PL22

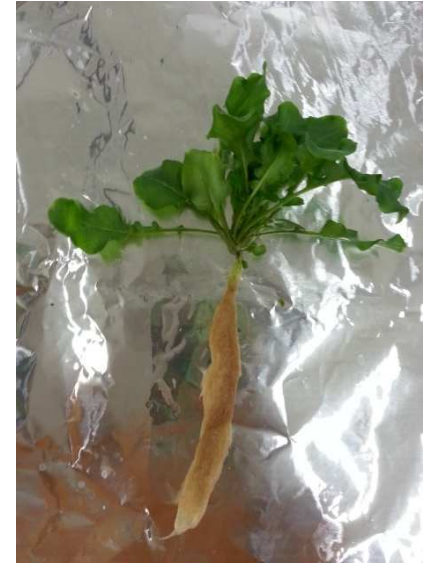

Figure S2: Different phenotypes of *A. halleri* populations and *A. lyrata* ssp *petreae* after 3 weeks exposure to 5  $\mu$ M CdSO<sub>4</sub>. Scale is the same for all pictures.

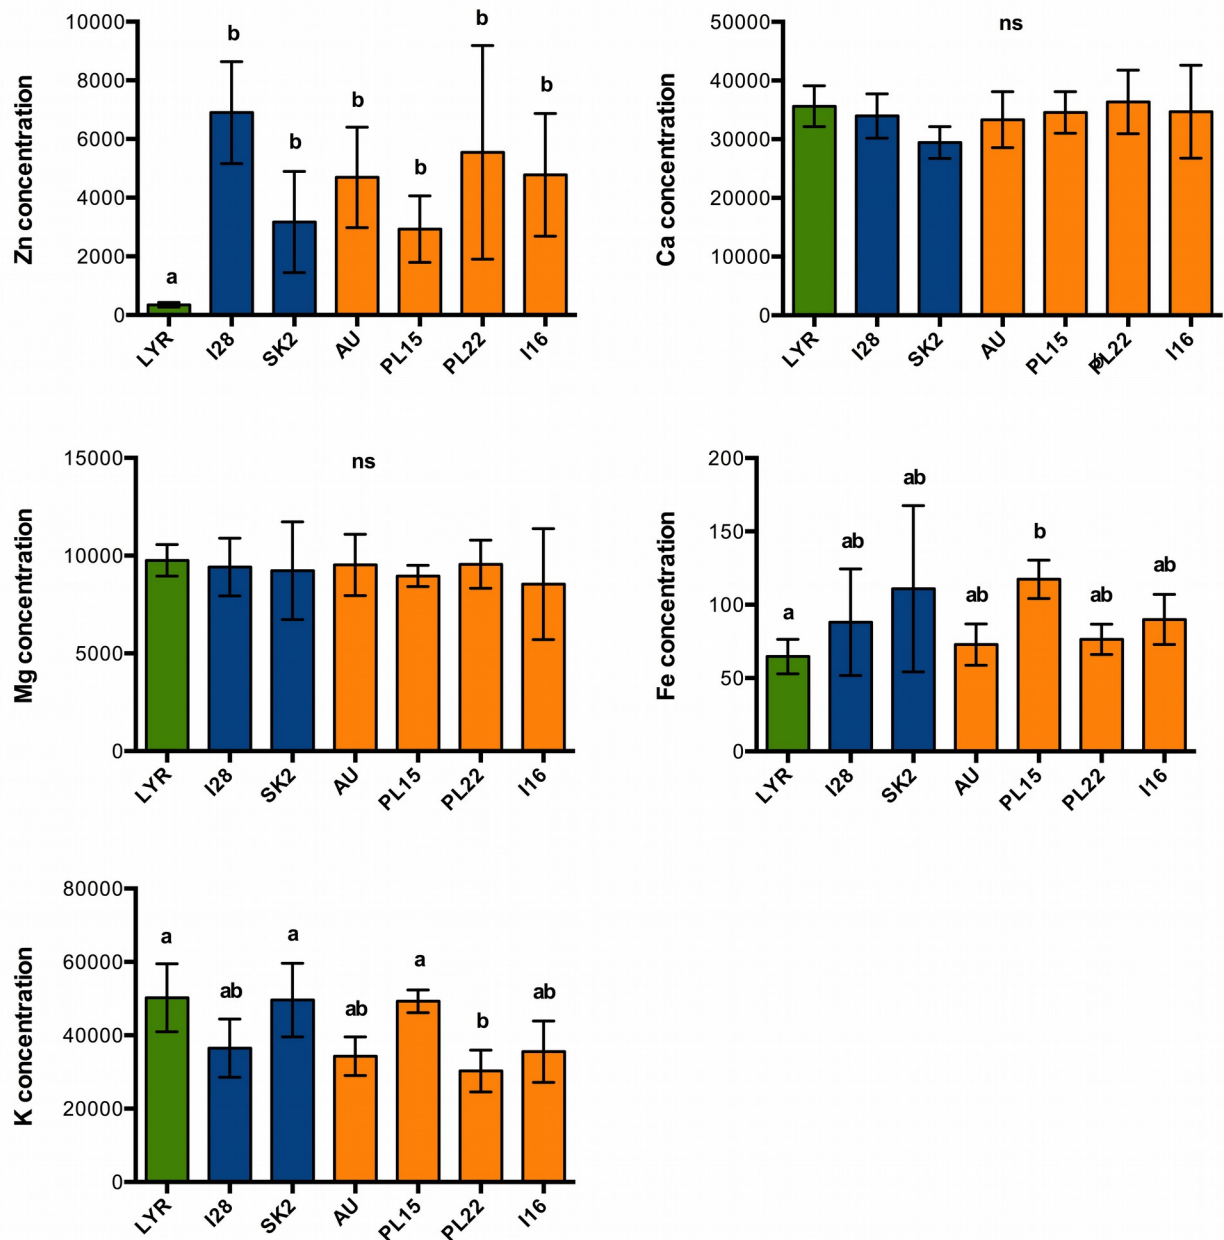

**Figure S3:** Mineral concentration ( $\mu\text{g g}^{-1}$ ) in hydroponically growth *A. halleri* NM (blue bars) and M (orange bars) populations and *A. lyrata petraea* (green bars) after 3-weeks culture in control solution ( $0 \mu\text{M CdSO}_4$ ). Data are means  $\pm$  SD,  $n = 5$  to 16. Letters indicate significant differences at the 5% level; ns, non significant.

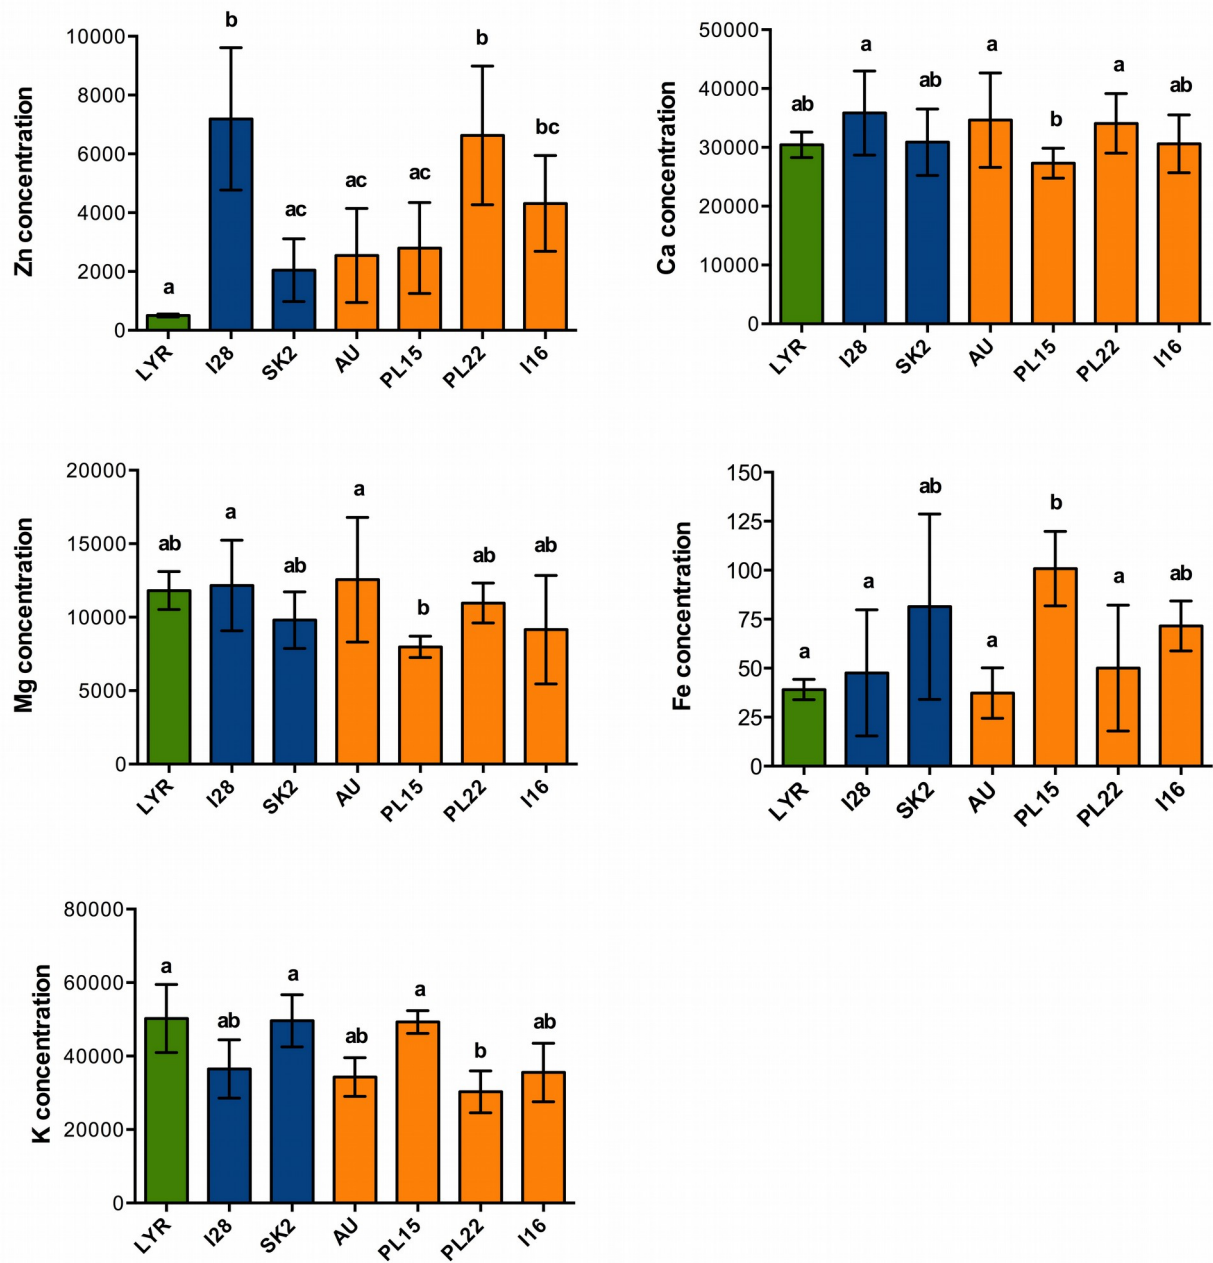

**Figure S4:** Mineral concentration ( $\mu\text{g g}^{-1}$ ) in hydroponically growth *A. halleri* NM (blue bars) and M (orange bars) populations and *A. lyrata petraea* (green bars) after 3-weeks culture at  $5 \mu\text{M}$   $\text{CdSO}_4$ . Data are means  $\pm$  SD,  $n = 4$  to 16. Letters indicate significant differences at the 5% level.

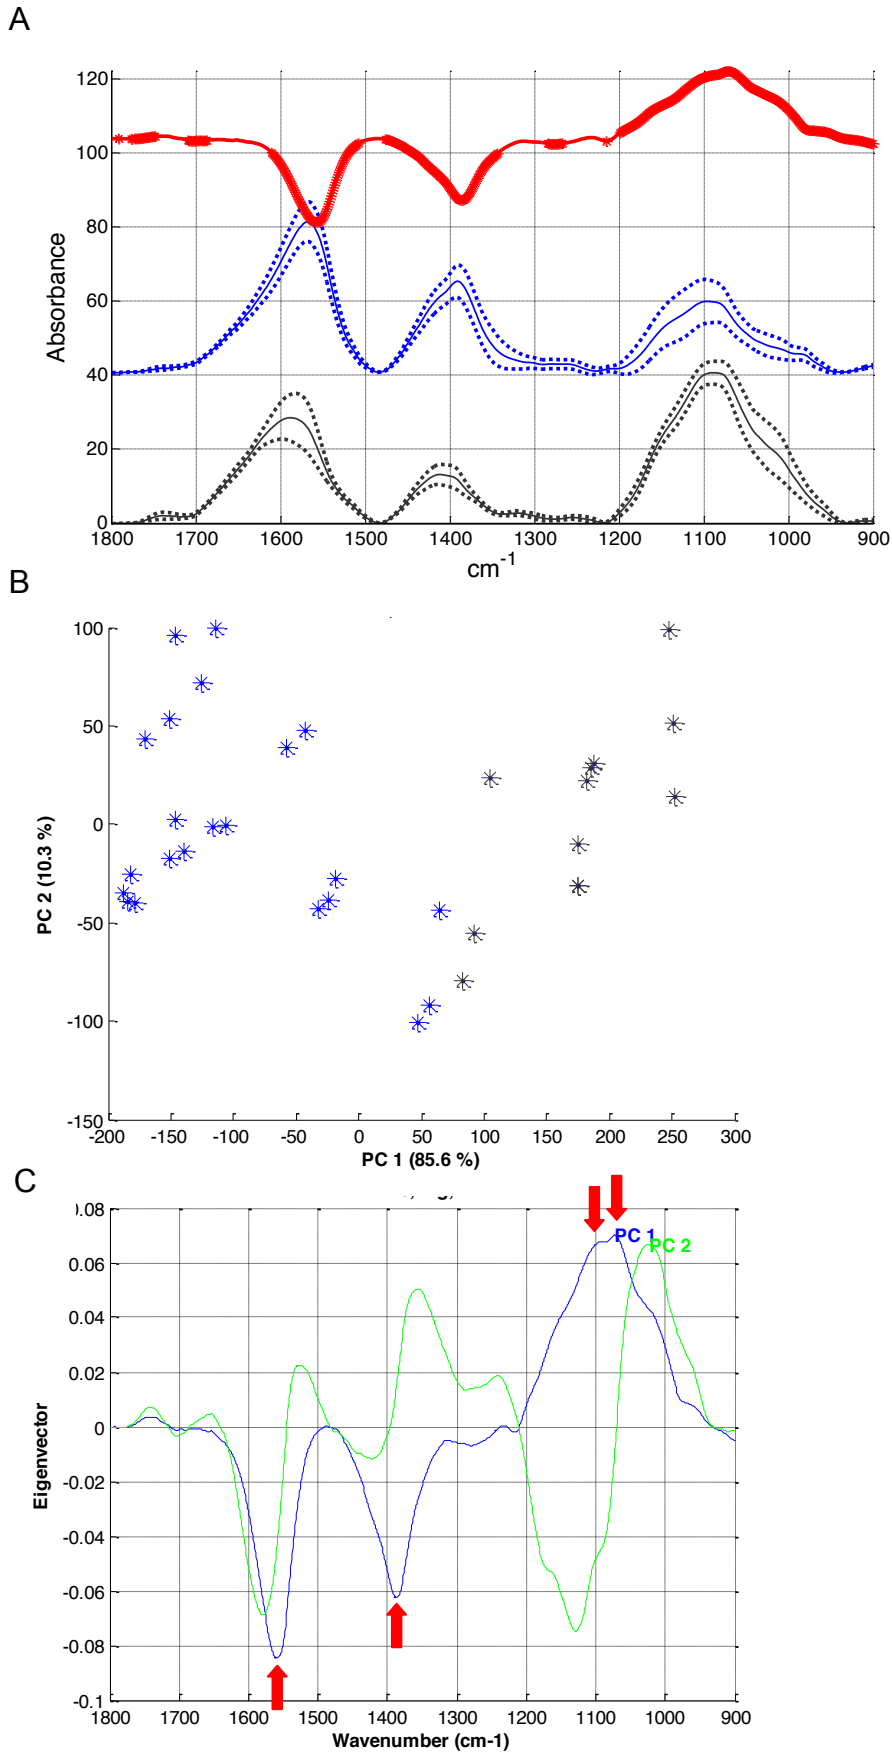

**Figure S5:** A, Mean spectrum obtained at 0 (blue line) and 5  $\mu\text{M}$   $\text{CdSO}_4$  (black line) for *A. lyrata petrae* individuals and spectrum of the difference between these two average spectra (red line). Thicker lines indicates wavenumbers statistically different according to a Student t-test ( $\alpha=1\%$ ). Spectra have been normalized to the same arbitrary area between 1800 and 900  $\text{cm}^{-1}$ . Note that spectra have been offset for better readability. B, Plot of the first and second PCs based on the FT-IR spectra obtained from *A. lyrata petrae* individuals grown in NC (blue dots) and C (red dots) conditions. C, Loading factor for PC1 (blue line) and PC2 (green line) explaining PCA clustering. Arrows point the discussed wavenumbers.

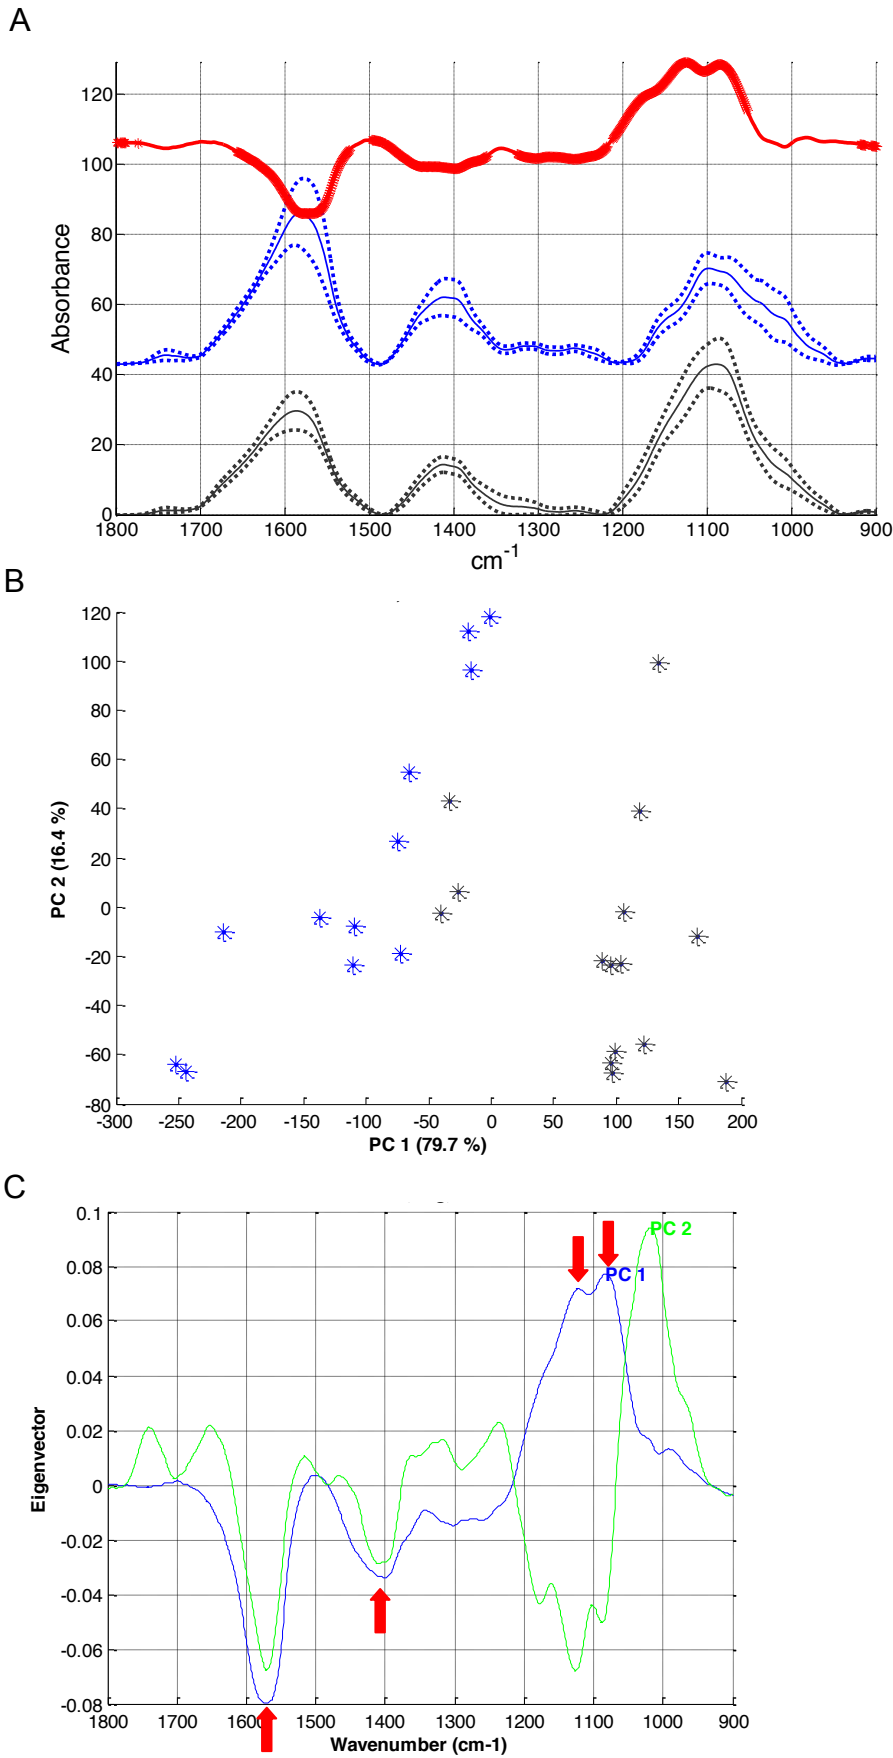

**Figure S6:** A, Mean spectrum obtained at 0 (blue line) and 5  $\mu\text{M}$  CdSO<sub>4</sub> (black line) for *A. halleri* individuals from the NM population I28 and spectrum of the difference between these two average spectra (red line). Thicker lines indicates wavenumbers statistically different according to a Student t-test ( $\alpha=1\%$ ). Spectra have been normalized to the same arbitrary area between 1800 and 900  $\text{cm}^{-1}$ . Note that spectra have been offset for better readability. B, Plot of the first and second PCs based on the FT-IR spectra obtained from *A. lyrata petreae* individuals grown in NC (blue dots) and C (red dots) conditions. C, Loading factor for PC1 (blue line) and PC2 (green line) explaining PCA clustering. Arrows point the discussed wavenumbers.



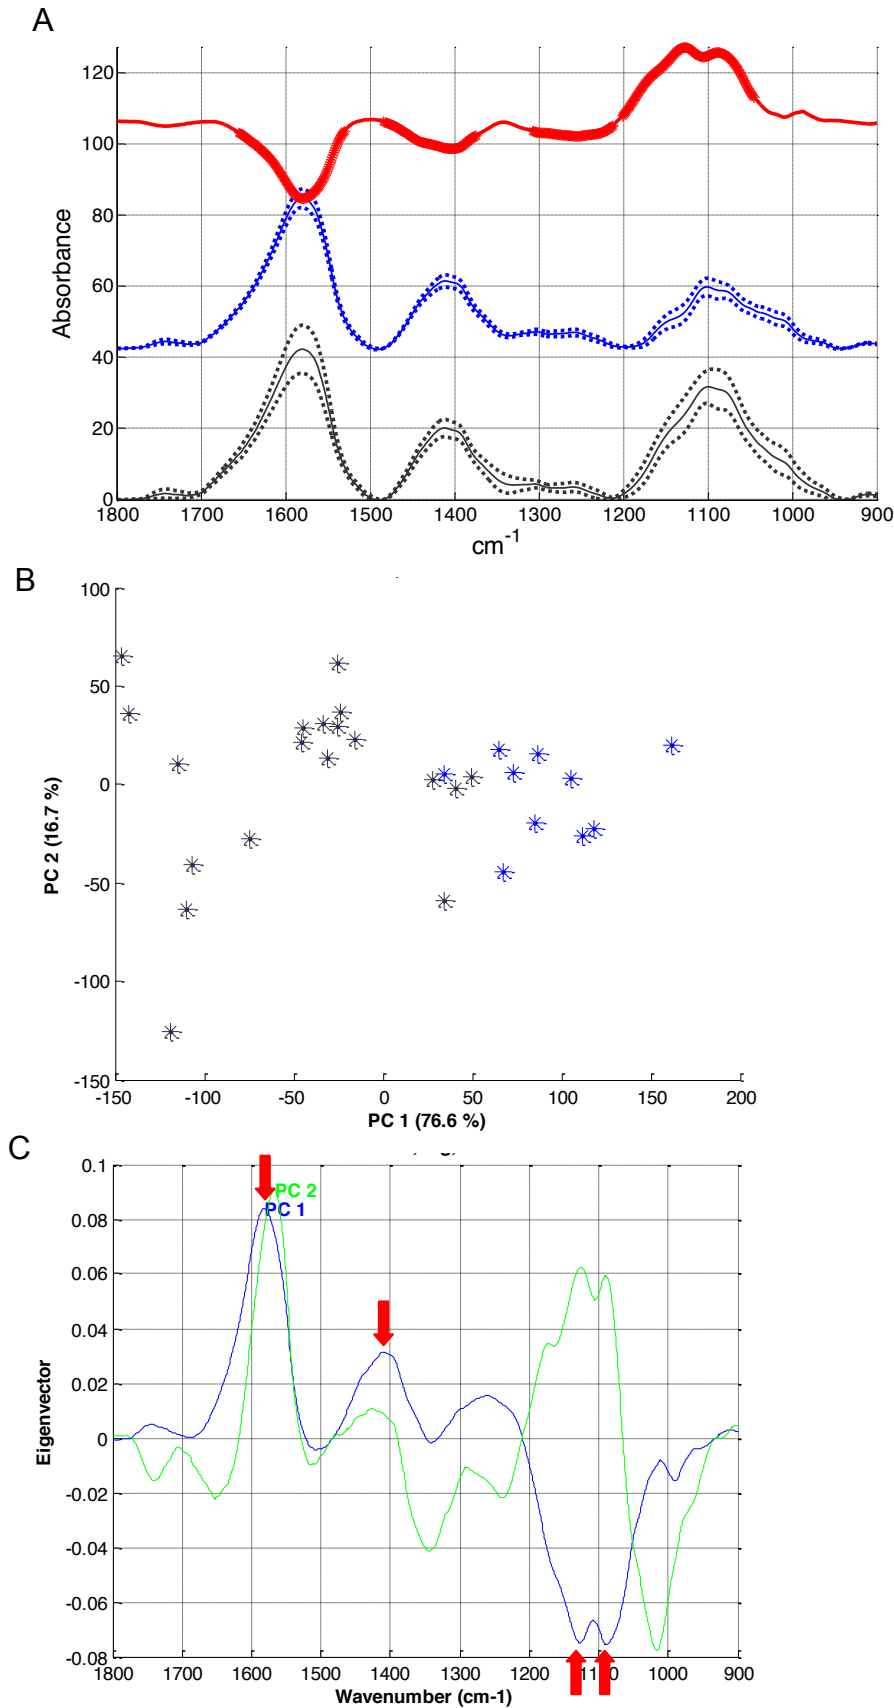

**Figure S7:** A, Mean spectrum obtained at 0 (blue line) and 5  $\mu\text{M}$  CdSO<sub>4</sub> (black line) for *A. halleri* individuals from the M population AU and spectrum of the difference between these two average spectra (red line). Thicker lines indicates wavenumbers statistically different according to a Student t-test ( $\alpha=1\%$ ). Spectra have been normalized to the same arbitrary area between 1800 and 900  $\text{cm}^{-1}$ . Note that spectra have been offset for better readability. B, Plot of the first and second PCs based on the FT-IR spectra obtained from *A. lyrata petrae* individuals grown in NC (blue dots) and C (red dots) conditions. C, Loading factor for PC1 (blue line) and PC2 (green line) explaining PCA clustering. Arrows point the discussed wavenumbers.

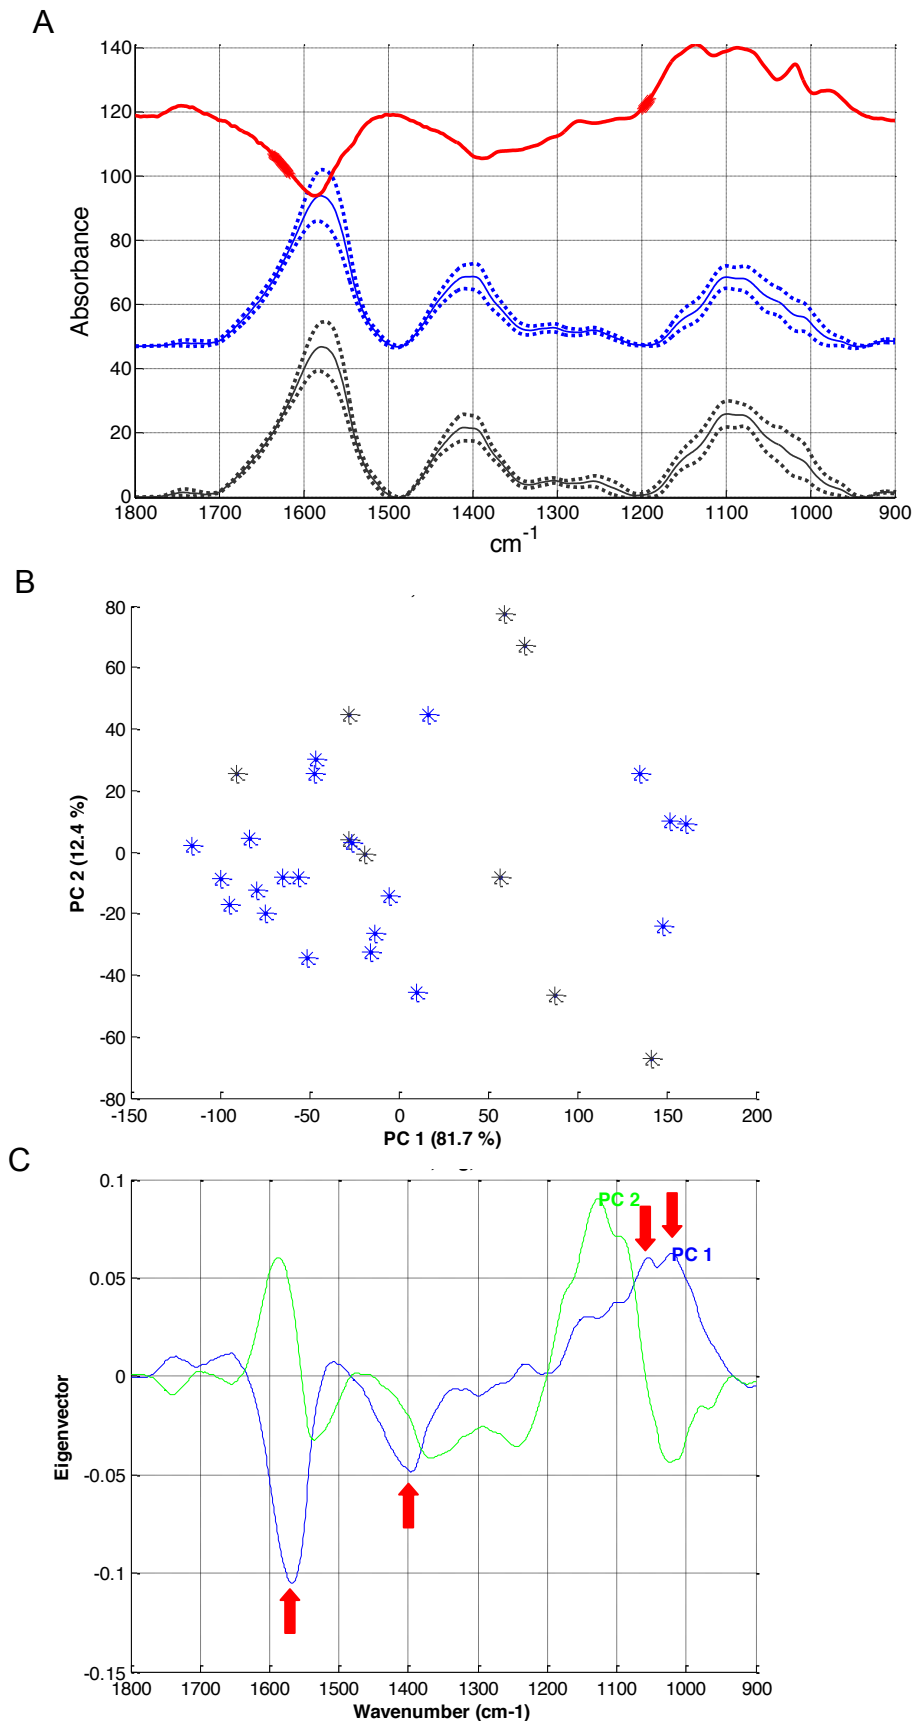

**Figure S8:** A, Mean spectrum obtained at 0 (blue line) and 5  $\mu\text{M}$   $\text{CdSO}_4$  (black line) for *A. halleri* individuals from the M population PL22 and spectrum of the difference between these two average spectra (red line). Thicker lines indicates wavenumbers statistically different according to a Student t-test ( $\alpha=1\%$ ). Spectra have been normalized to the same arbitrary area between 1800 and 900  $\text{cm}^{-1}$ . Note that spectra have been offset for better readability. B, Plot of the first and second PCs based on the FT-IR spectra obtained from *A. lyrata petraea* individuals grown in NC (blue dots) and C (red dots) conditions. C, Loading factor for PC1 (blue line) and PC2 (green line) explaining PCA clustering. Arrows point the discussed wavenumbers.

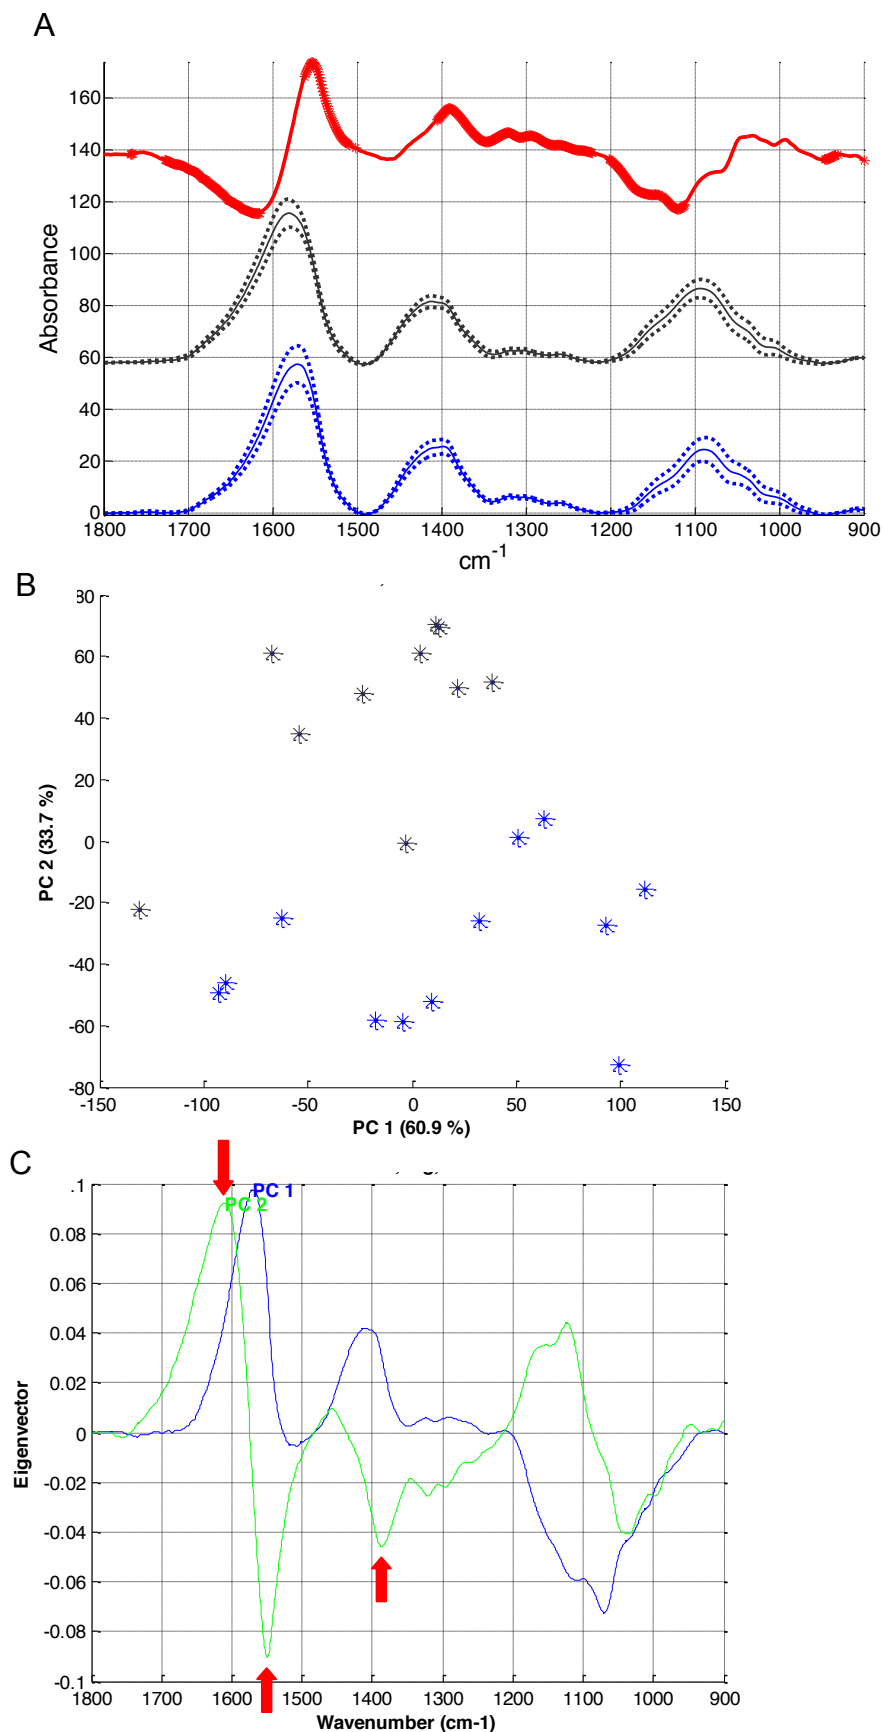

**Figure S9:** A, Mean spectrum obtained at 0 (blue line) and 5  $\mu\text{M}$  CdSO<sub>4</sub> (black line) for *A. halleri* individuals from the M population I16 and spectrum of the difference between these two average spectra (red line). Thicker lines indicates wavenumbers statistically different according to a Student t-test ( $\alpha=1\%$ ). Spectra have been normalized to the same arbitrary area between 1800 and 900  $\text{cm}^{-1}$ . Note that spectra have been offset for better readability. B, Plot of the first and second PCs based on the FT-IR spectra obtained from *A. lyrata petrae* individuals grown in NC (blue dots) and C (red dots) conditions. C, Loading factor for PC1 (blue line) and PC2 (green line) explaining PCA clustering. Arrows point the discussed wavenumbers.
